# Supplementary material
Source: PubMed Central journal article supplement (PMC4868343)

Figure 2

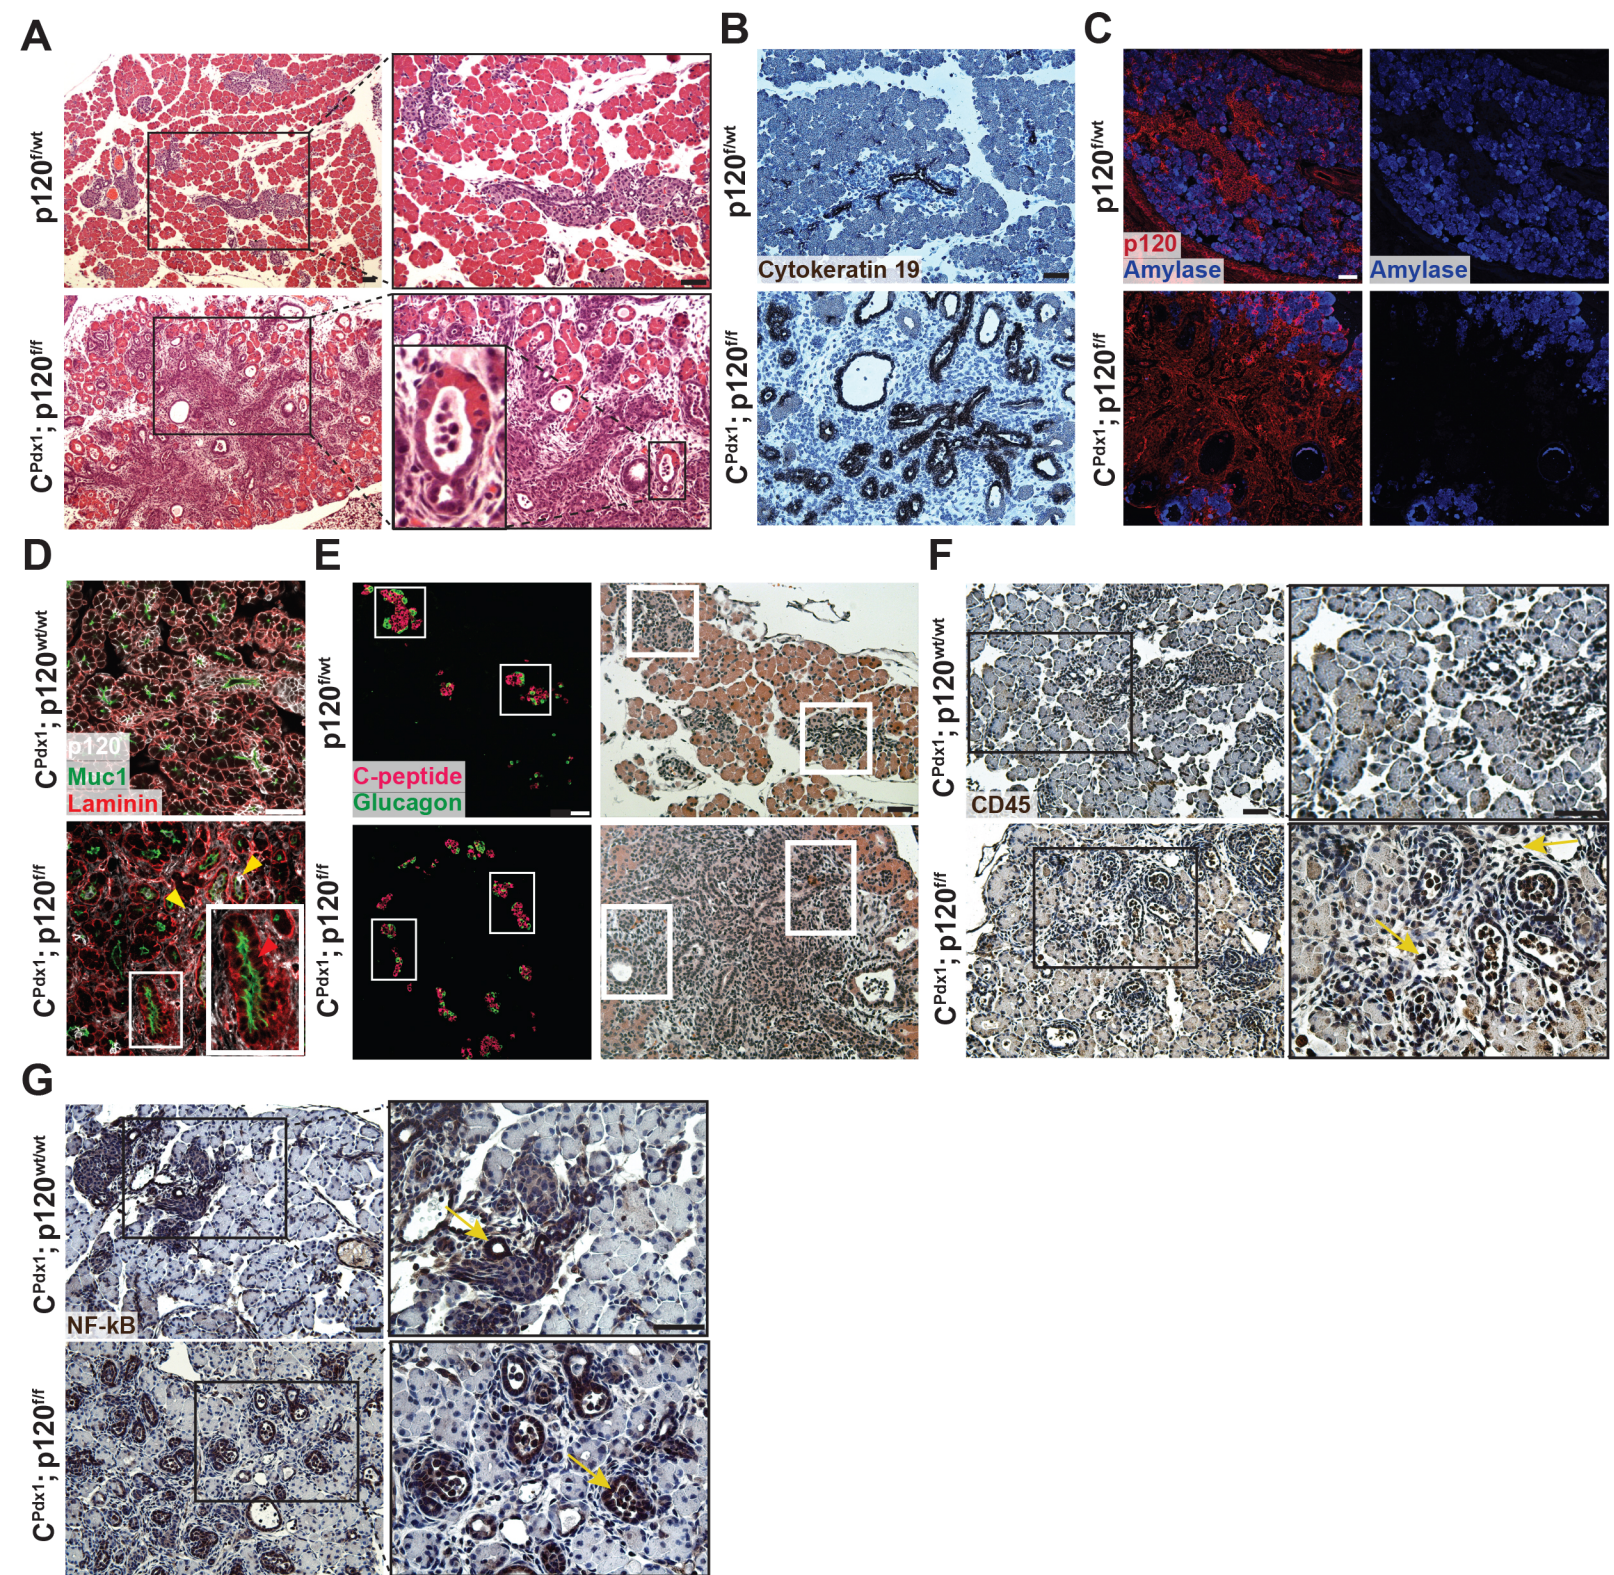

Supplement: NIHMS651611-supplement-1.pdf [file NIHMS651611-supplement-1.pdf]

Figure 3

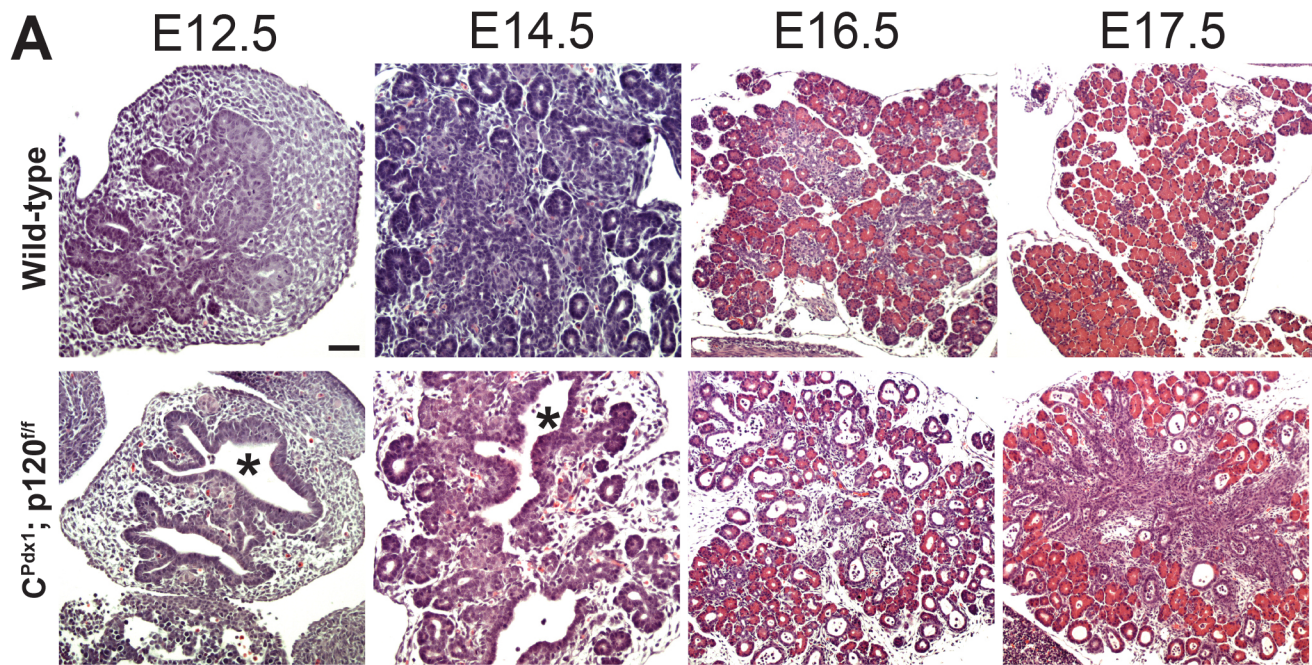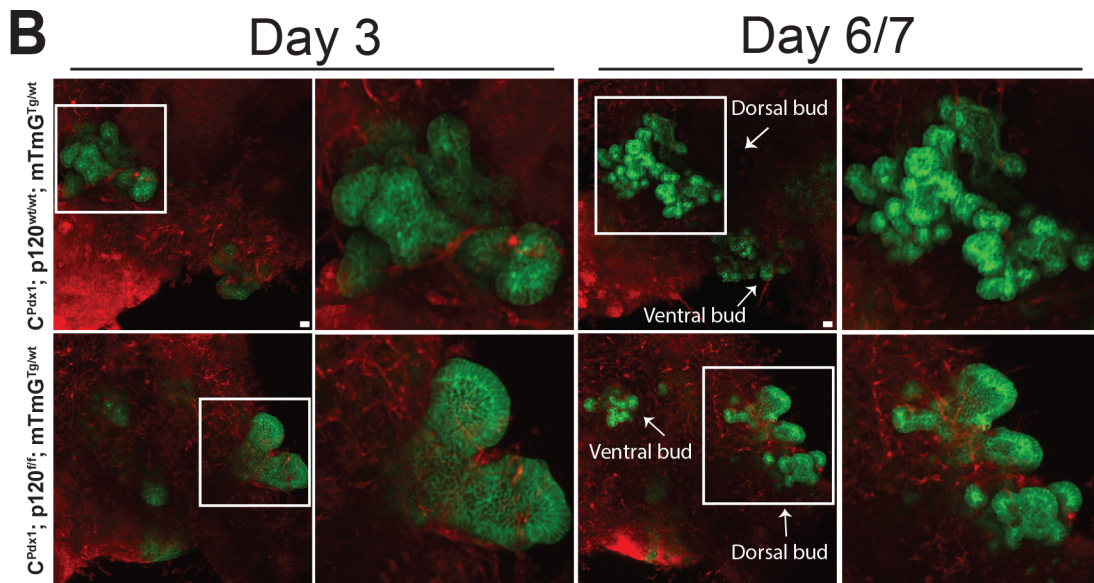

Supplement: NIHMS651611-supplement-2.pdf [file NIHMS651611-supplement-2.pdf]

Figure 4

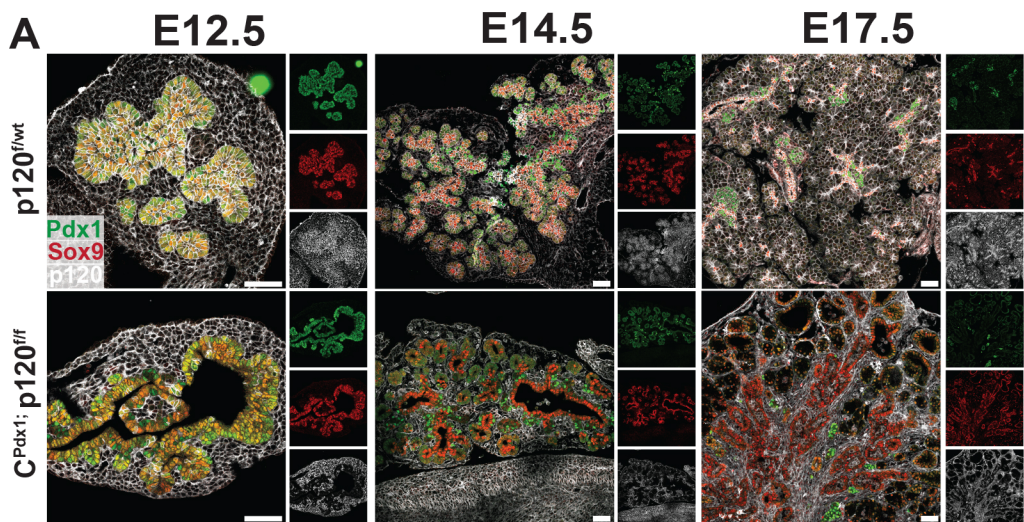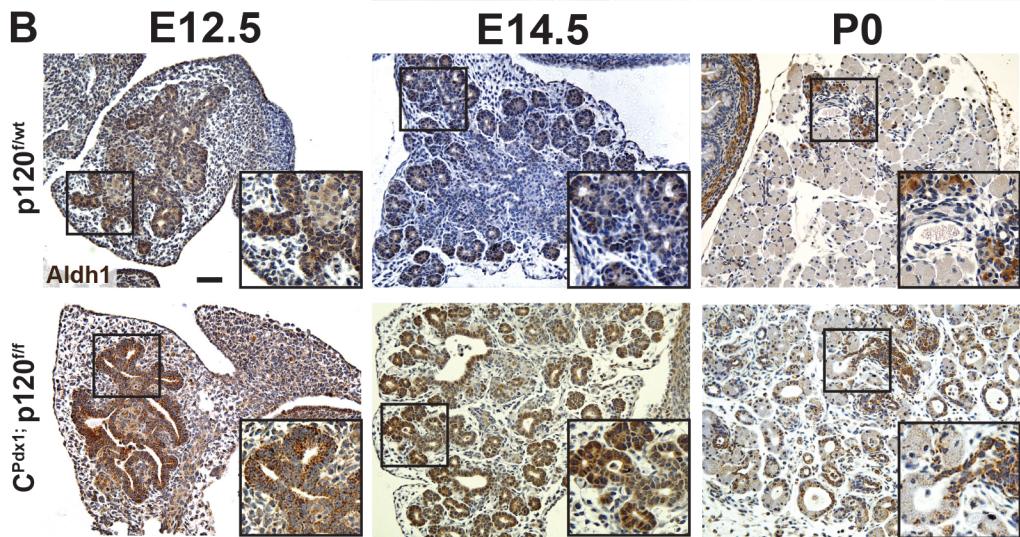

Supplement: NIHMS651611-supplement-3.pdf [file NIHMS651611-supplement-3.pdf]

# Supplemental Figure 1

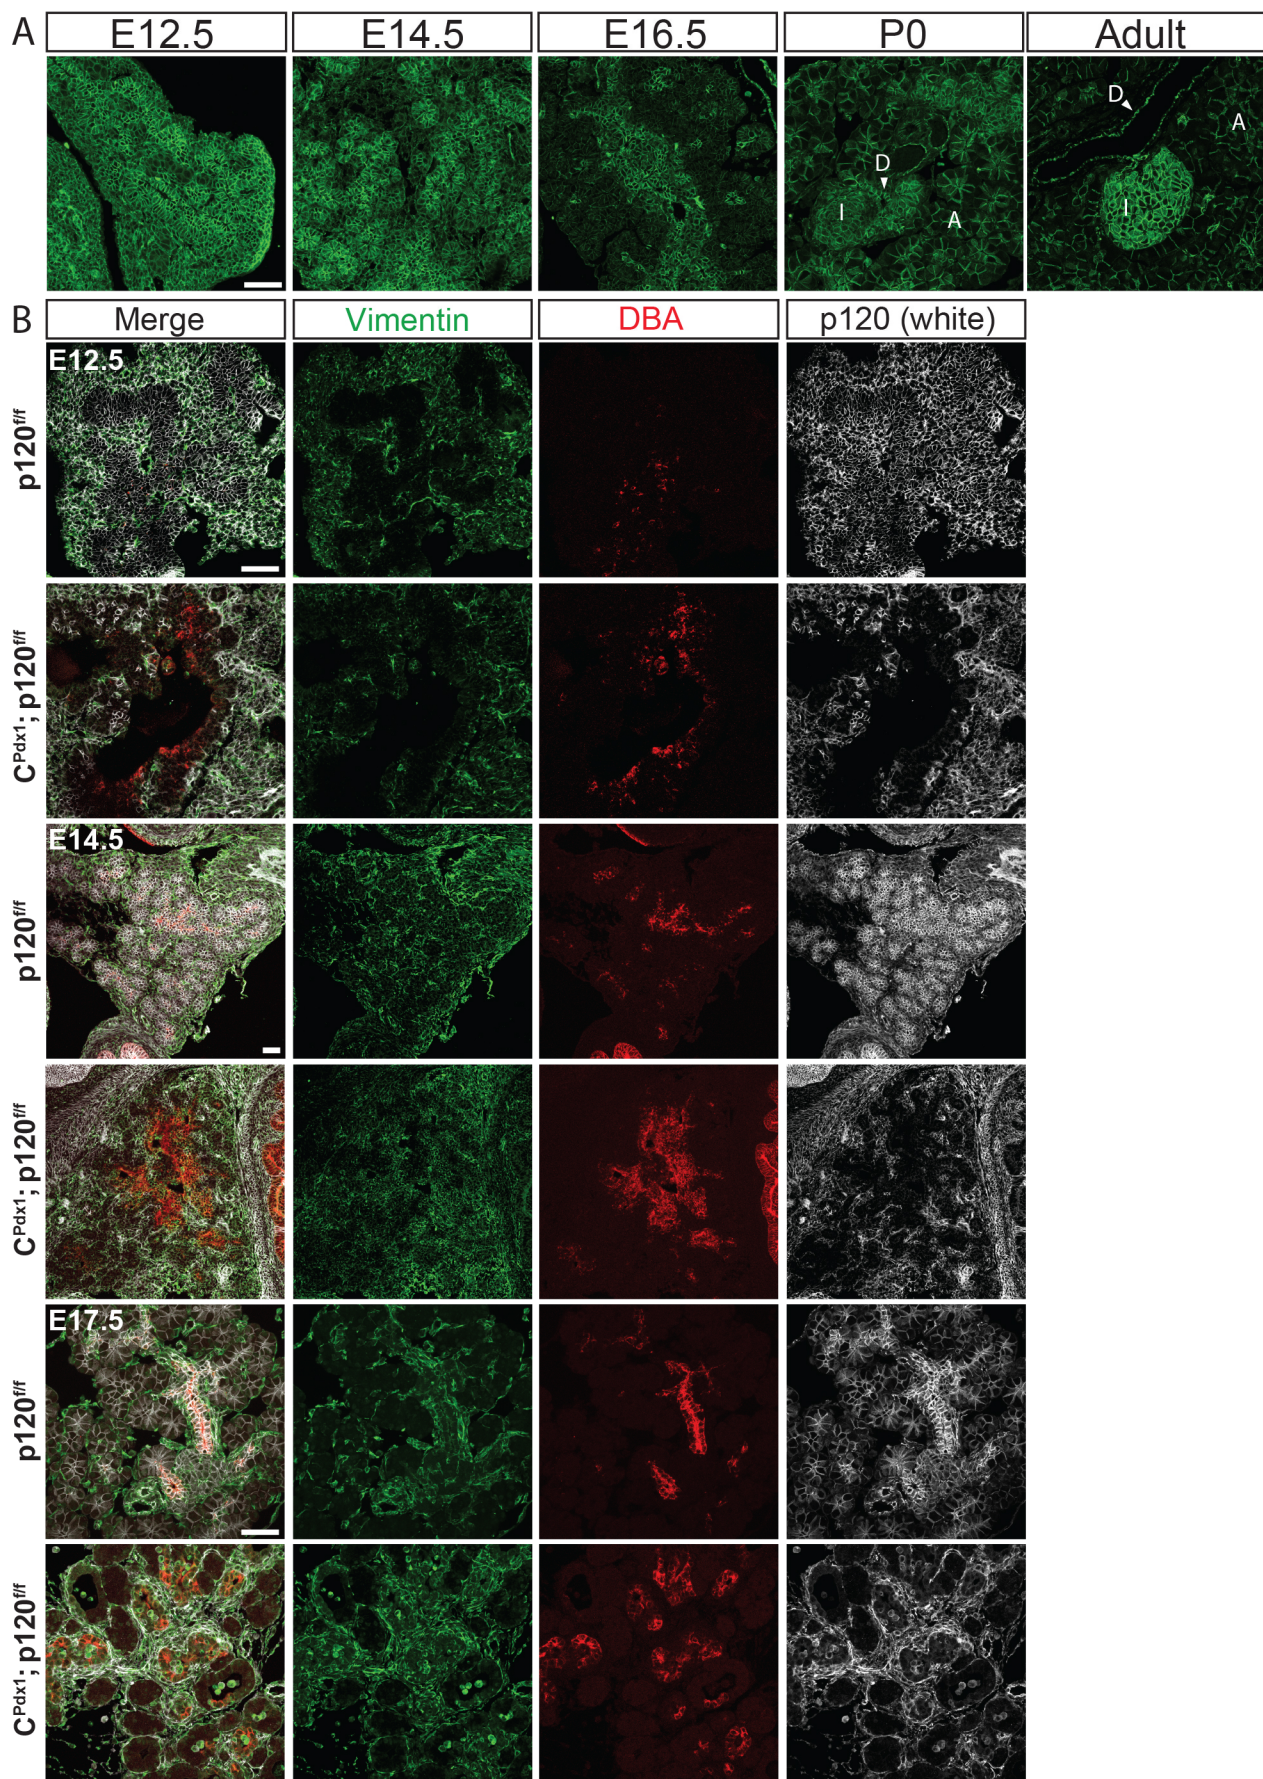

Supplement: NIHMS651611-supplement-4.pdf [file NIHMS651611-supplement-4.pdf]

# Supplemental Figure 2

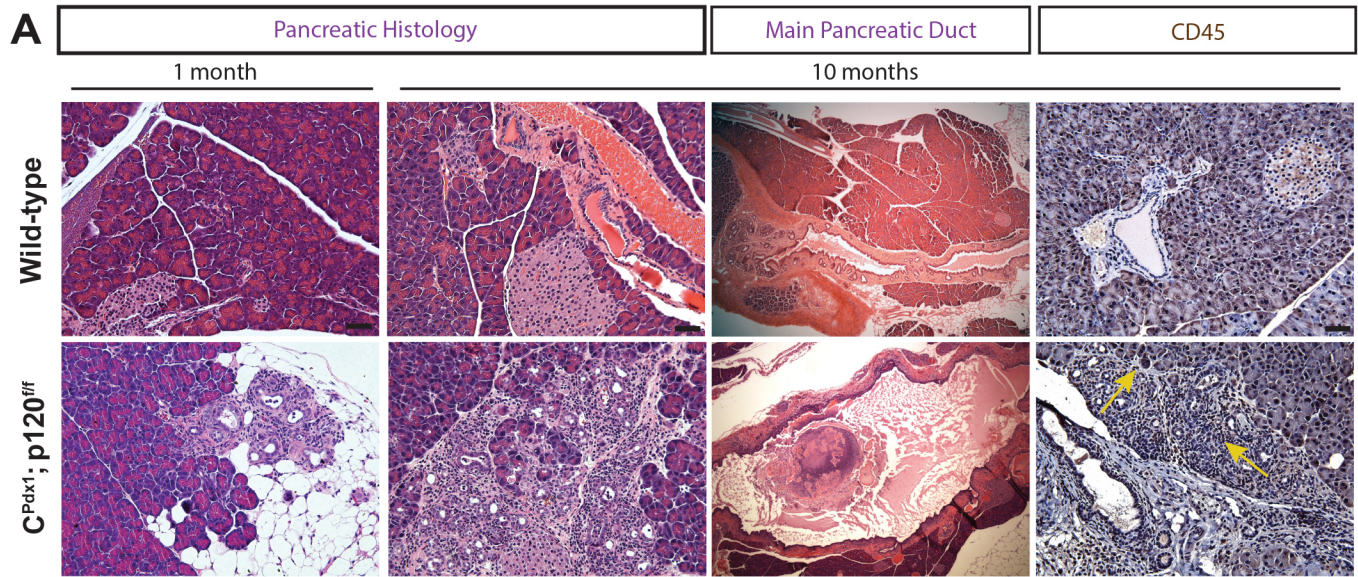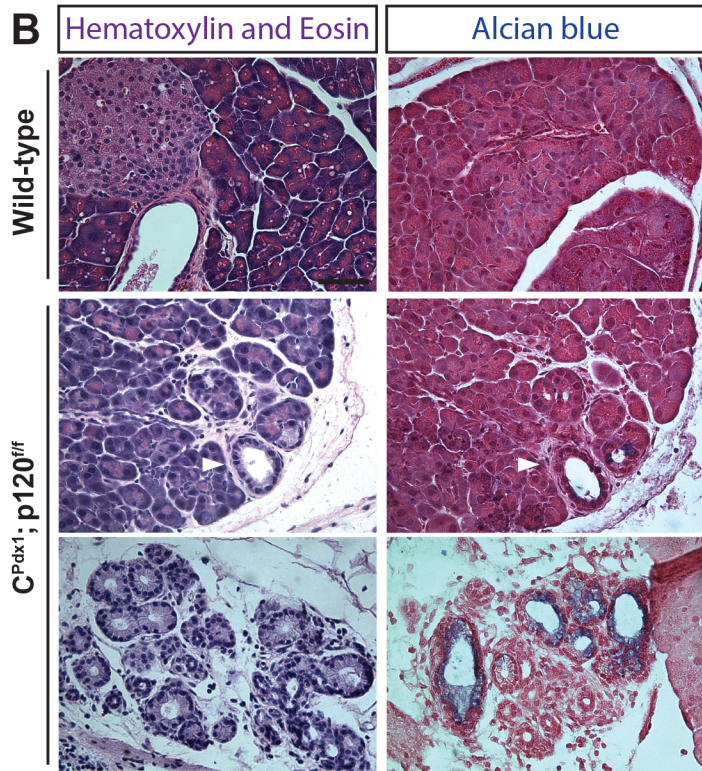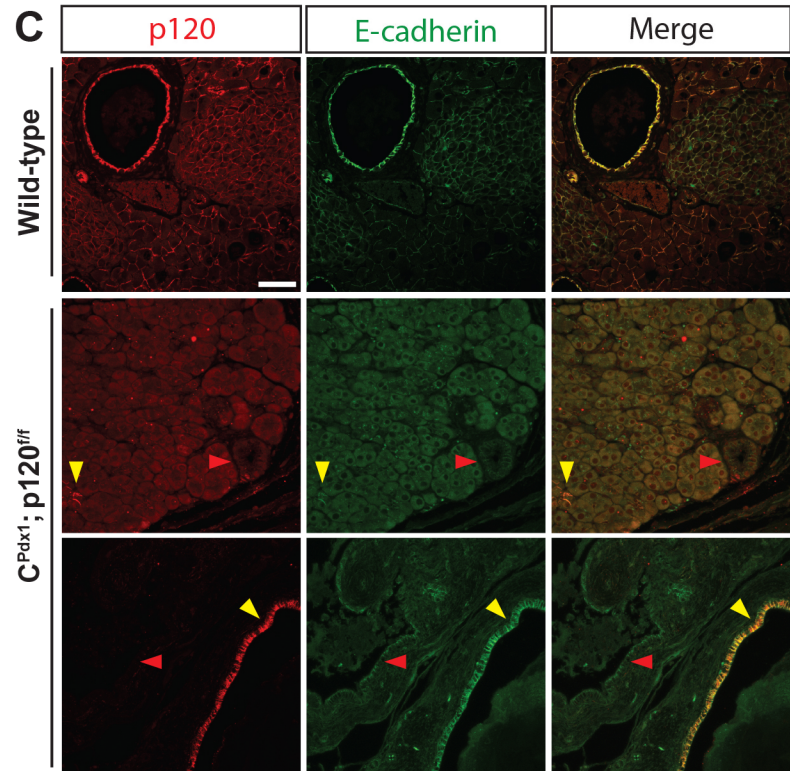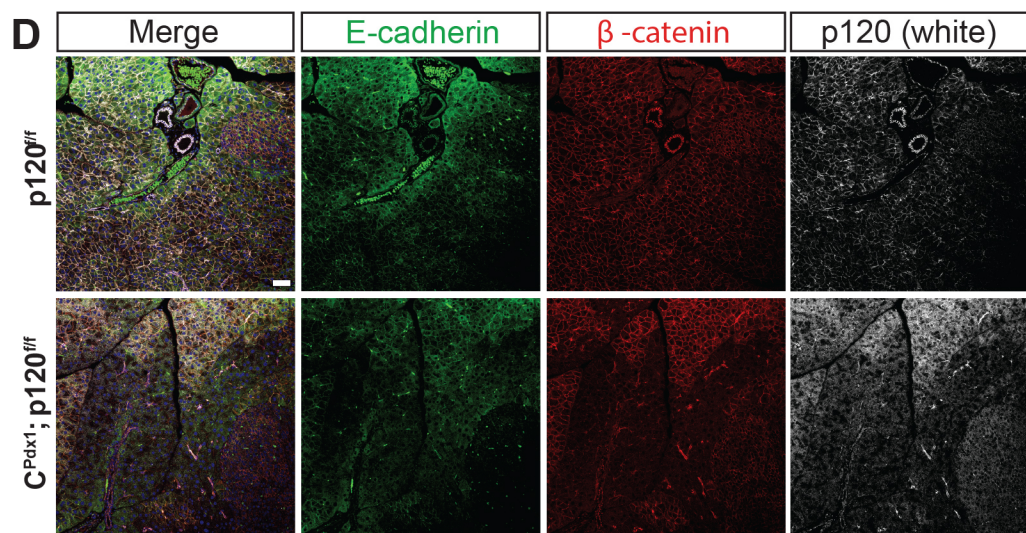

Supplement: NIHMS651611-supplement-5.pdf [file NIHMS651611-supplement-5.pdf]

# Supplemental Figure 3

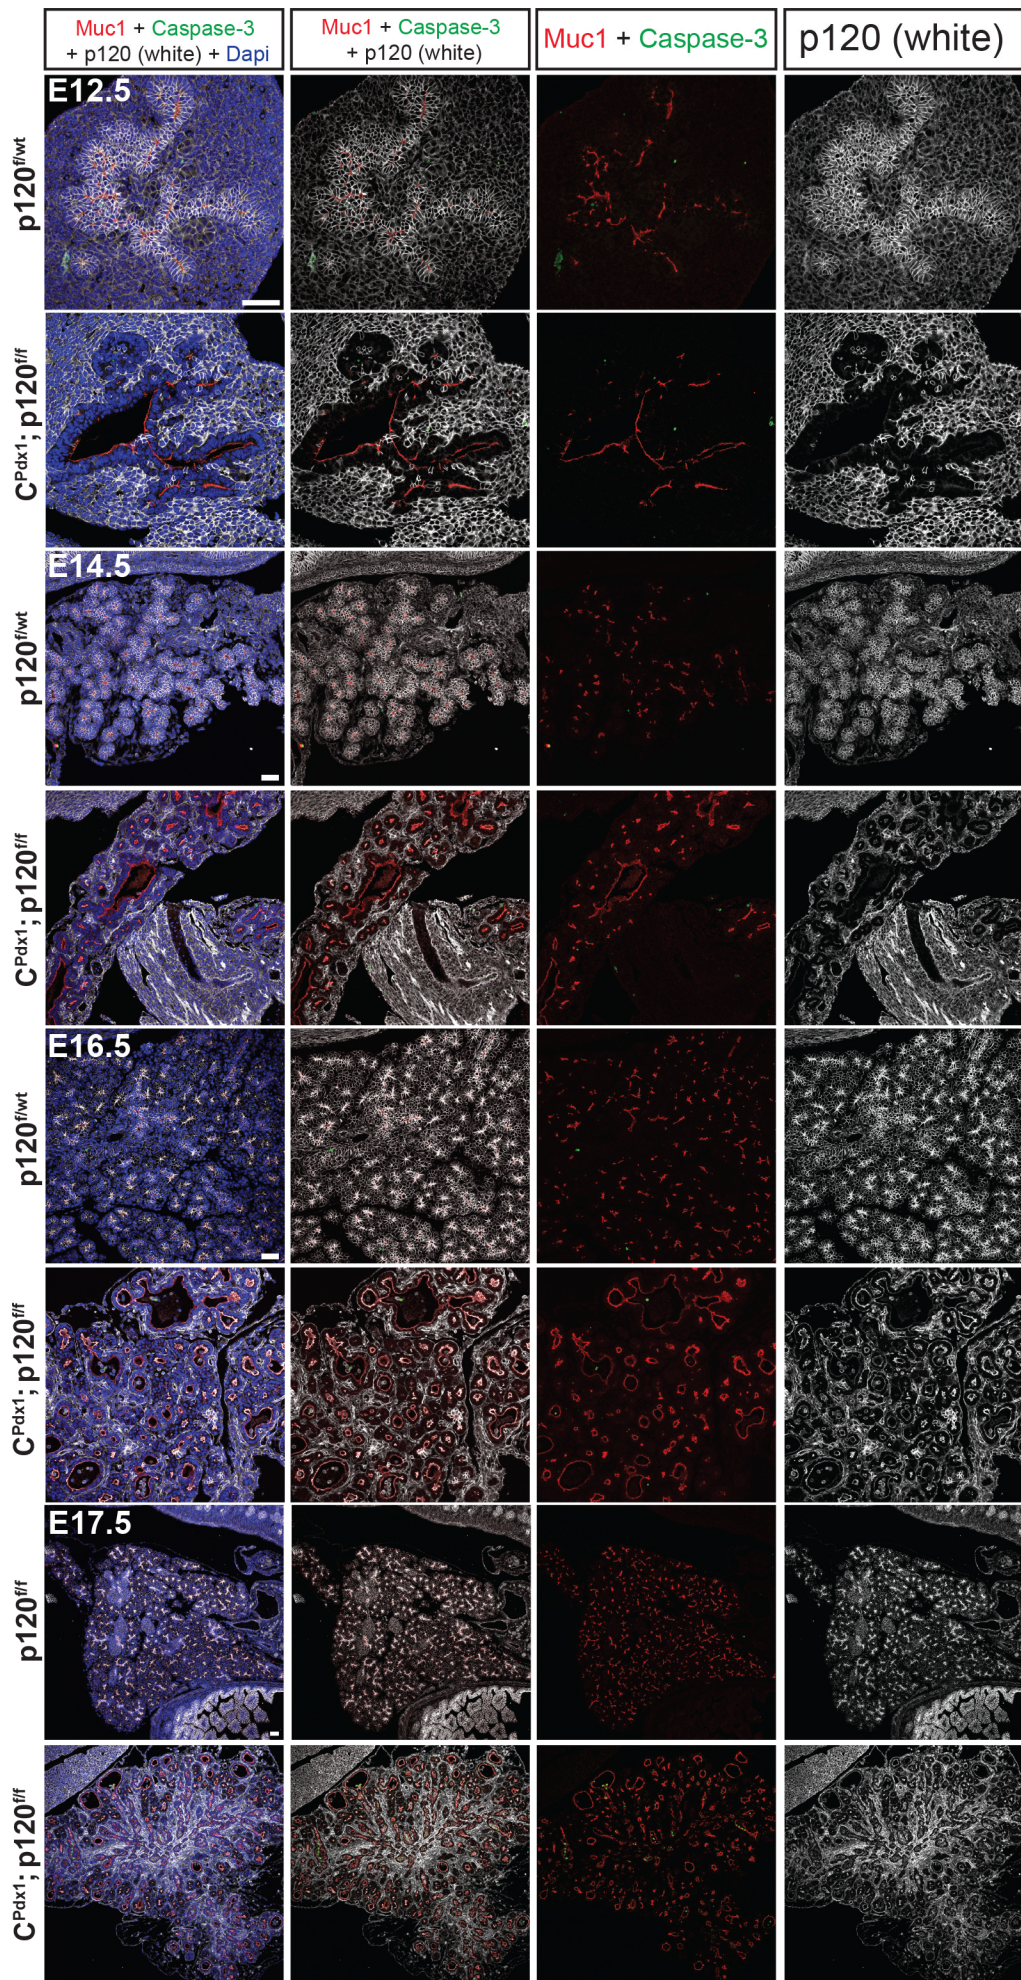

Supplement: NIHMS651611-supplement-6.pdf [file NIHMS651611-supplement-6.pdf]

# Supplemental Figure 4

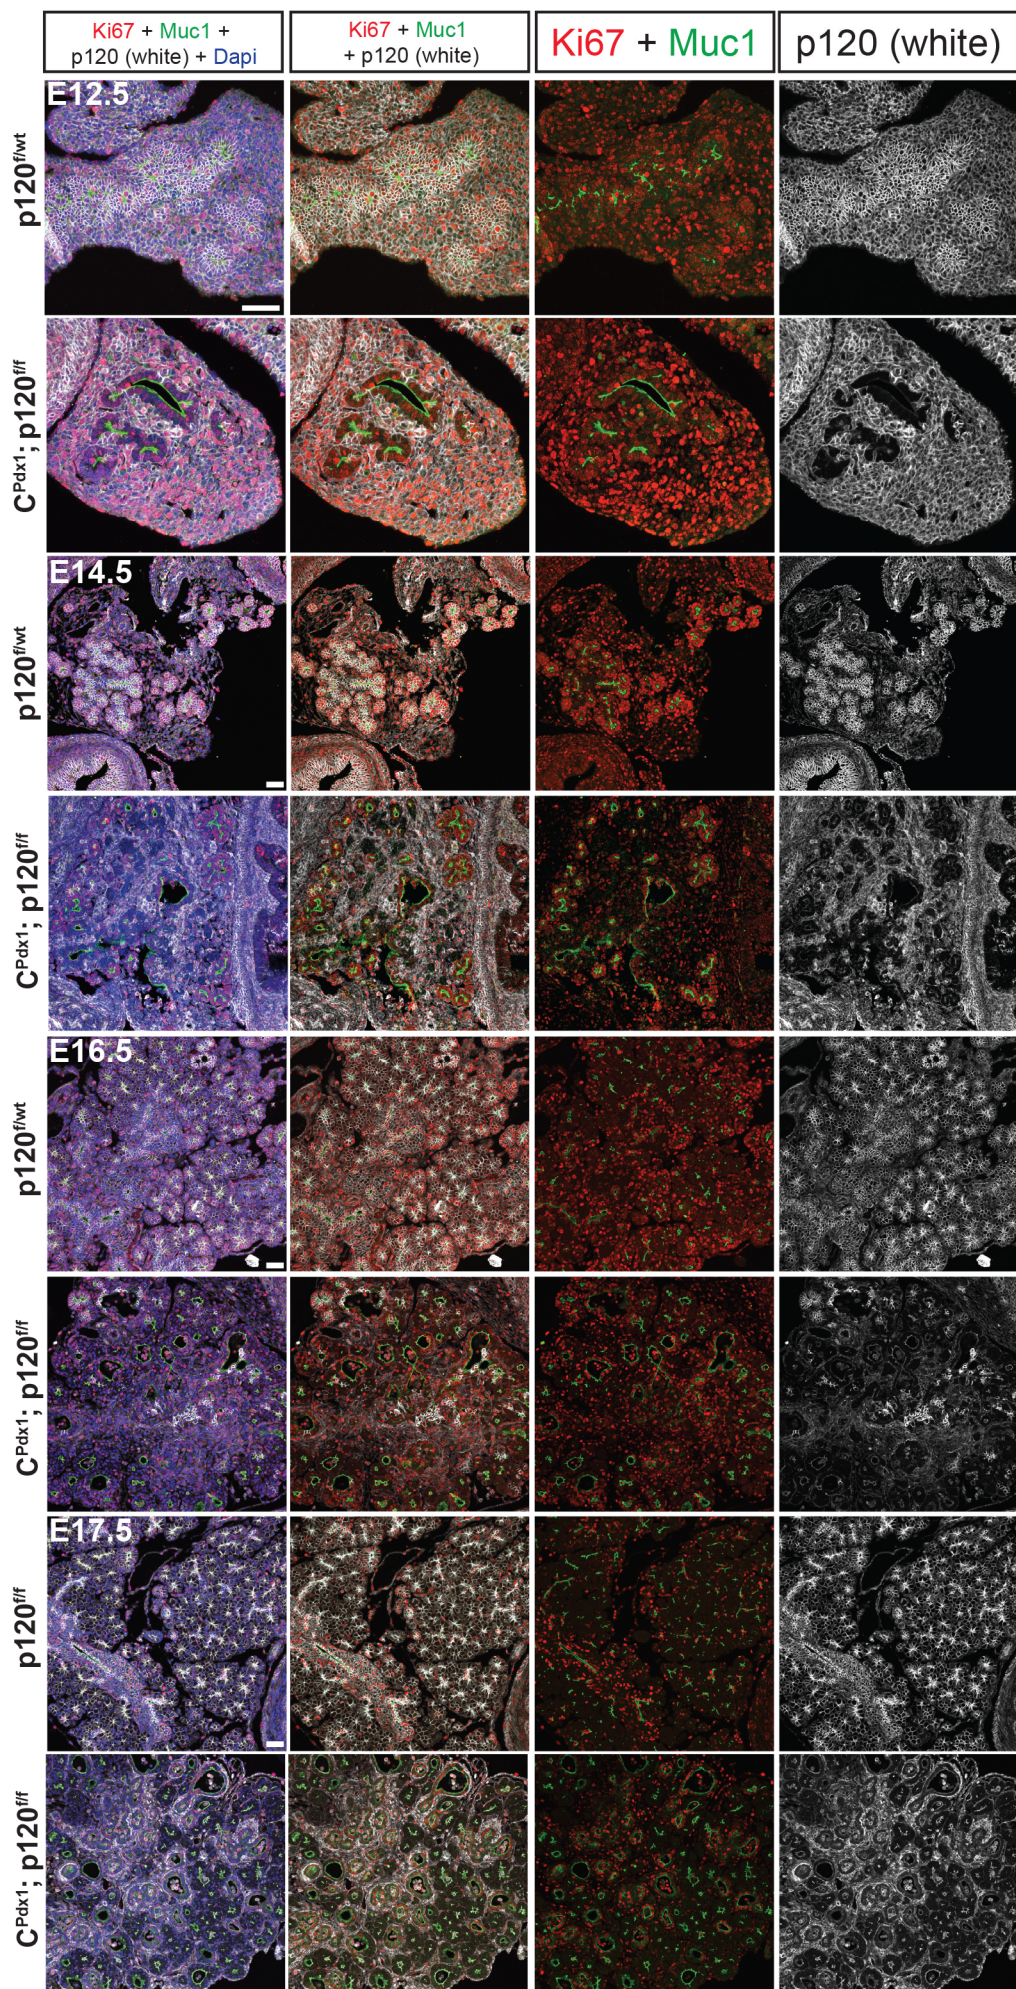

Supplement: NIHMS651611-supplement-7.pdf [file NIHMS651611-supplement-7.pdf]
